# Supplementary material
Source: Springer Nature journal article supplement (https://www.springermedizin.de/resource/supplementary/13058_2011_2846_MOESM7_ESM.pdf/9702476)

**A**

| Treatment     | Tumours/Cohort |
|---------------|----------------|
| SCi           | 4/4            |
| SCi + TRAIL   | 3/5            |
| FLiPi         | 4/4            |
| FLiPi + TRAIL | 1/5            |

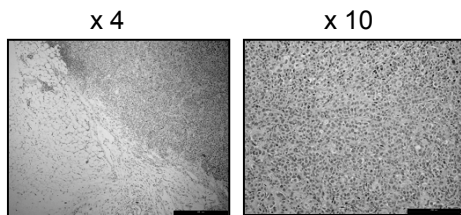**C**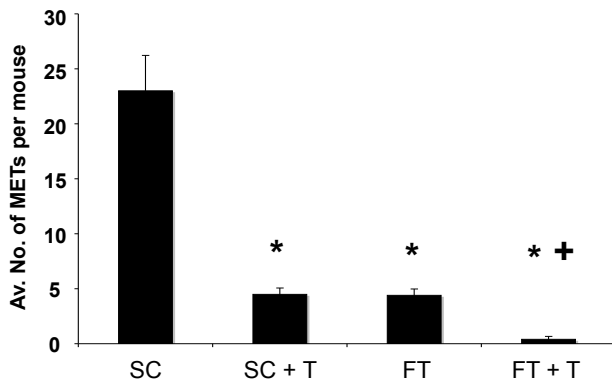**B**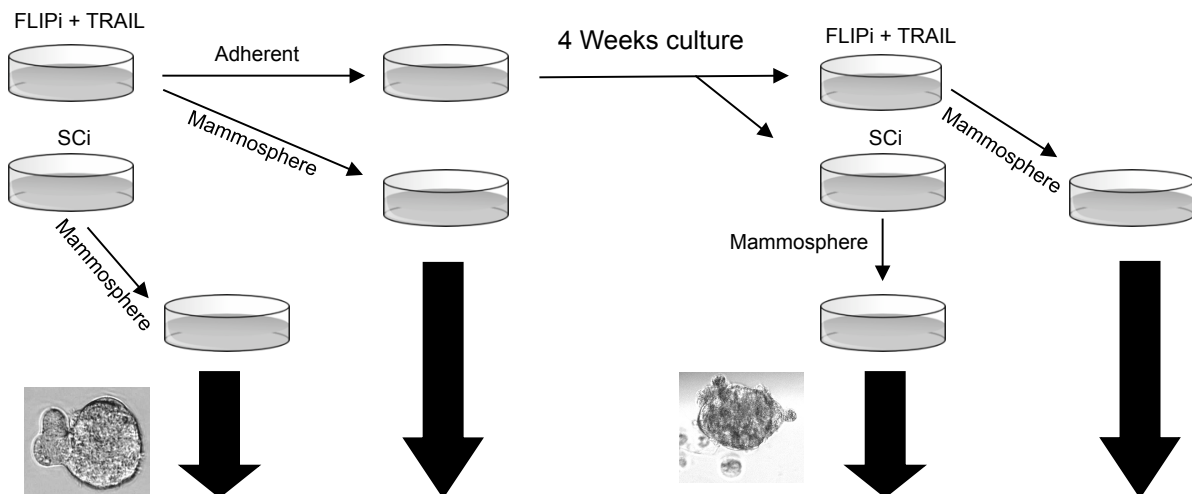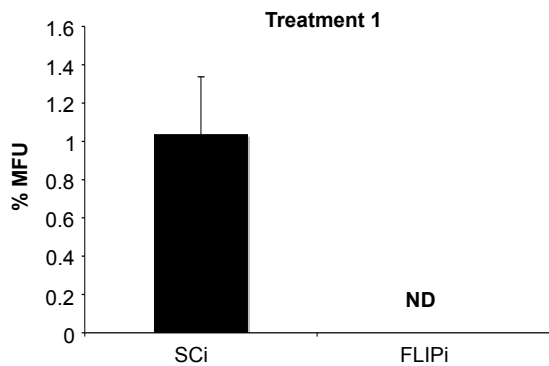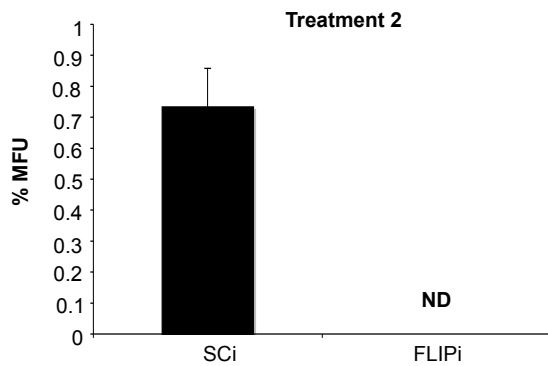

Supplement: MOESM7 [file 9702476]
